# Supplementary material
Source: bioRxiv or medRxiv preprint supplement (https://www.biorxiv.org/highwire/filestream/33041/field_highwire_adjunct_files/0/099168-1.pdf)
Supplement: Supplementary file [file 099168-1.pdf]

### Supplementary Table 1

Hemiptera BUSCO markers were selected from 9 species in OTHODBv9.1 and included 3350 genes. The an

Table 1a: Genome

| <b>Data</b>            | <b>Sequences</b> | <b>Complete</b> | <b>Fragmented</b> | <b>Missing</b> |
|------------------------|------------------|-----------------|-------------------|----------------|
| <b>Diaci1.1 genome</b> | <b>161,988</b>   | 74.80%          | 0.30%             | 24.90%         |
| <b>Pea aphid v2.3</b>  | <b>31,391</b>    | 21.00%          | 0.00%             | 79.00%         |
| <b>Bed bug v1.1</b>    | <b>41,503</b>    | 83.40%          | 0.30%             | 16.30%         |
| <b>White fly v1.1</b>  | <b>19,761</b>    | 77.90%          | 0.00%             | 22.10%         |

Table 1b: Gene sets and transcriptome

| <b>Data</b>       | <b>Sequences</b> | <b>Complete</b> | <b>Fragmented</b> | <b>Missing</b> |
|-------------------|------------------|-----------------|-------------------|----------------|
| <b>OGS v1.0</b>   | <b>21,026</b>    | 74.50%          | 0.30%             | 25.20%         |
| <b>MCOT v1.0</b>  | <b>30,562</b>    | 92.90%          | 0.10%             | 7.00%          |
| <b>NCBI v100</b>  | <b>20,996</b>    | 74.70%          | 0.30%             | 25.00%         |
| <b>Maker v1.1</b> | <b>18,242</b>    | 72.30%          | 0.40%             | 27.30%         |
| <b>Egg</b>        | <b>76,467</b>    | 71.50%          | 0.20%             | 28.30%         |
| <b>Nymph</b>      | <b>69,175</b>    | 71.60%          | 0.10%             | 28.30%         |
| <b>Adult</b>      | <b>62,412</b>    | 60.60%          | 0.20%             | 39.20%         |

alysis shows the number of markers present full-length, in fragments and missing from a given dataset.
